# Supplementary material for: Mitochondrial Genome of Phlebia radiata Is the Second Largest (156 kbp) among Fungi and Features Signs of Genome Flexibility and Recent Recombination Events
Source: PLoS One. 2014 May 13;9(5):e97141. doi: 10.1371/journal.pone.0097141 (PMC4019555; doi:10.1371/journal.pone.0097141)
Supplement: Table S2 — ORFs continuing from coding sequence exons into putative intronic regions. (XLSX) [file pone.0097141.s002.xlsx]

## Sheet: Sheet1
Table S2. ORFs of P. radiata mtDNA that continue from exons into putative intronic regions.
Locus tag	Extends	Length aa	Start	End	Strand	BLASTP
						Putative product	Organism	E-value	Query coverage
NA	cox1 exon 3	323	3286	4254	+	homing endonuclease	Agaricus bisporus	5e-114	0.8
NA	cox1 exon 6	295	10171	11055	+	LAGLIDADG endonuclease	Ustilago maydis	6e-87	0.98
NA	cox1 exon 9	294	13407	14288	+	orf263	Rhizophydium sp. 136	2e-73	0.76
NA	nad4L exon 1	104	64544	64855	+	unnamed protein product	Neurospora crassa	2e-06	0.55
NA	cox1 exon 8	94	12233	12514	+	homing endonuclease	Agaricus bisporus	4e-06	0.64
PRA_mt0165	cob exon 2	839	121245	123764	-	Reverse transcriptase	Schizosaccharomyces pombe	0	0.92
PRA_mt0006	cox1 exon 2	383	1707	2858	+	predicted protein	Populus trichocarpa	7e-124	0.69
PRA_mt0040	cox1 exon11	247	16649	17392	+	orf294	Podospora anserina	6e-83	0.94
PRA_mt0043	cox1 exon 12	426	17740	19020	+	orf261	Mortierella verticillata	6e-15	0.41
PRA_mt0100	cox3 exon1	246	59057	59797	+	hypothetical protein GlirM_p27	Rhizophagus irregularis	5e-93	0.9
PRA_mt0110	nad5 exon 1	127	66477	66860	+	hypothetical protein SMAC_12657	Sordaria macrospora k-hell	2e-28	0.97
PRA_mt0123	nad5 exon 3	121	70366	70731	+	rps3/homing endonuclease-like fusion protein	Grosmannia laricis	1e-28	0.61
PRA_mt0126	nad5 exon 4	303	71966	72877	+	hypothetical protein AlmafMp10	Allomyces macrogynus	7e-38	0.69
